# Supplementary material for: The Structural Characterization and Immunomodulatory Activity of Polysaccharides from Pleurotus abieticola Fruiting Bodies
Source: MDPI journal article supplement (doi:10.3390/nu14204410), 2022-10-20
Supplement: s1 [file s1]

# Supplementary Information

## Methods for methylation and NMR analysis

### 1. Experimental conditions for methylation

As previously described [1], the bonding structure of PAPS1 was determined. Briefly, after derivatization included methylation and acetylation, PAPS1 was analysed by gas chromatography-mass spectrometer (GC-MS) (7890A GC coupled with 5977B inert XL MS detector; Agilent Technologies Inc. CA, UAS). According to the properties of compounds, the injection volume was 1  $\mu$ L, the split ratio was 10:1, the carrier gas was high-purity helium. The oven temperature was programmed from 140°C (2.0 min) to 230°C (3 min) at a ramp of 3°C. The quadrupole mass spectrometry detection system (Agilent 5977B; Agilent Technologies, USA) was adopted for the mass spectrometry system. The mass spectrometry was equipped with an electron impact ion source (EI) and a MassHunter workstation. The detection was under a full scan mode, with a mass scan range of 30-600 m/z.

### 2. Experimental conditions for NMR

Following the method previously published by our group [2], after the sample (15mg) dissolved in 500  $\mu$ L D<sub>2</sub>O, and the sample solution was filtered and transferred to a NMR tube. <sup>1</sup>H, <sup>13</sup>C, <sup>1</sup>H-<sup>1</sup>H correlation spectroscopy (COSY), heteronuclear single quantum correlation (HSQC), heteronuclear multiple bond correlation (HMBC) and nuclear overhauser effect spectroscopy (NOESY) were recorded using Bruker Avance AV600 NMR spectrometer (500 MHz for <sup>1</sup>H, 128 MHz for <sup>13</sup>C; Bruker, Germany). NMR spectrometer were equipped with liquid QXI <sup>1</sup>H/<sup>31</sup>P/<sup>13</sup>C/<sup>15</sup>N quadrupole resonance probe (Z-gradient; 5mm; Bruker, Germany). The technical parameters were as follows: signal to noise ratio (<sup>1</sup>H), 888; resolution (Hz), 0.32 (rotating). The technical parameters of liquid QXI <sup>1</sup>H/<sup>31</sup>P/<sup>13</sup>C/<sup>15</sup>N quadrupole resonance probe (Z-gradient) were as follows: signal to noise ratio (<sup>1</sup>H), 798; resolution (Hz), 0.26 (rotating), and signal to noise ratio (<sup>13</sup>C), 328; resolution (Hz), 0.1. NMR data were processed using MestReNova-14.0.0-23239 (Mestrelab Research, Santiago de Compostela, Spain).

## References for “Methods for methylation and NMR analysis”

- [1] W. Hu, M. Song, C. Wang, Z. Guo, Y. Li, D. Wang, Structural characterization of polysaccharide purified from *Herichium erinaceus* fermented mycelium and its pharmacological basis for application in Alzheimer's disease: Oxidative stress related calcium homeostasis, *International journal of biological macromolecules* (2021) 193(Pt A), 358-369.
- [2] J. Wang, J. Song, D. Wang, N. Zhang, J. Lu, Q. Meng, Y. Zhou, N. Wang, Y. Liu, D. Wang, L. Teng, The anti-membranous glomerulonephritic activity of purified polysaccharides from *Irpex lacteus* Fr, *International journal of biological macromolecules* (2016) 84, 87-93.

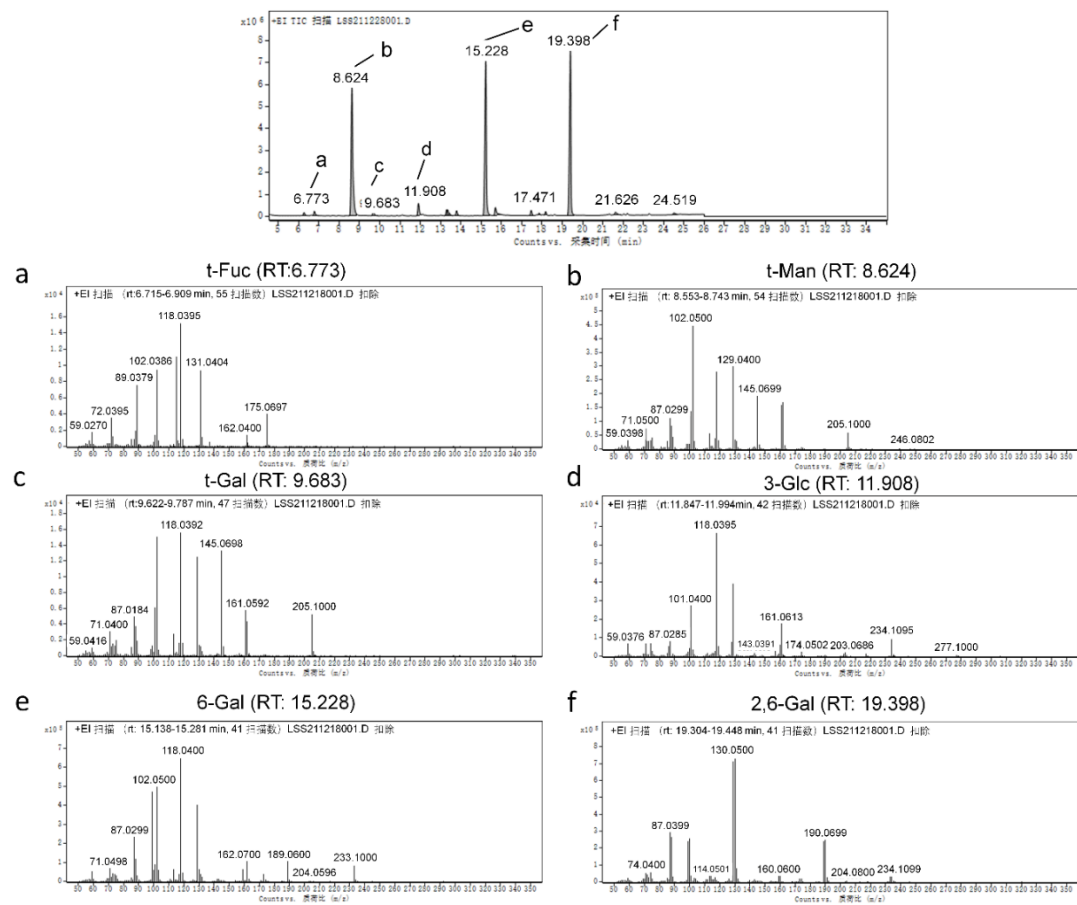

**Figure S1.** Methylation GC-MS chart of PAPS1. GC-MS, gas chromatography–mass spectrometry; PAPS1, water-soluble PA polysaccharides; Fuc, fucose; Man, mannose; Gal, galactose; Glc, glucose; RT, retention time.

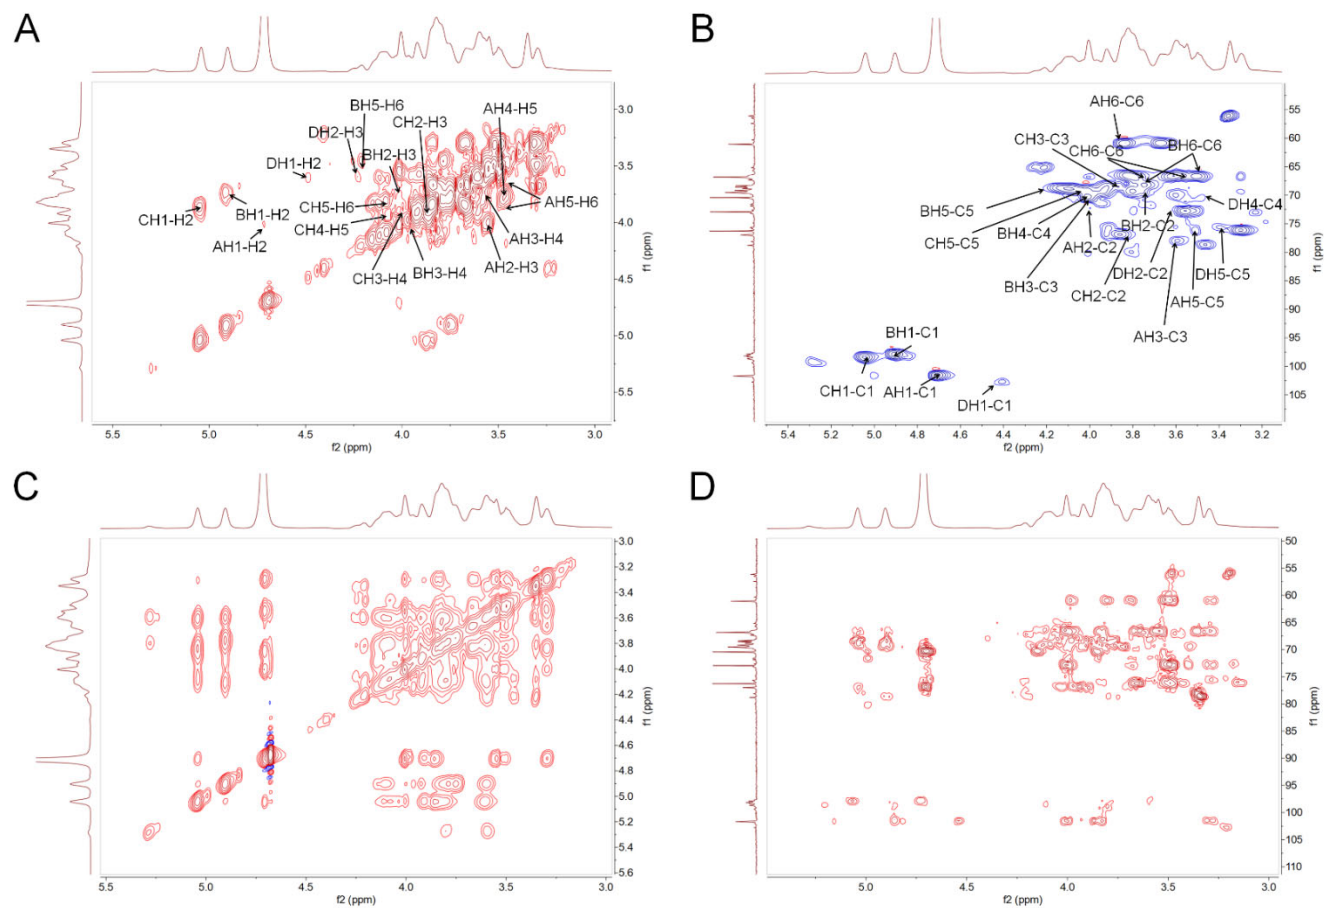

**Figure S2.** Structural characterization of PAPS1. Two-dimensional NMR atlas of (A)  $^1\text{H}$ - $^1\text{H}$  COSY, (B) HSQC, (C)  $^1\text{H}$ - $^1\text{H}$  NOESY and (D) HMBC. PAPS1, water-soluble PA polysaccharides; NMR, Nuclear magnetic resonance; COSY, correlation spectroscopy; HSQC, heteronuclear single quantum correlation; NOESY, nuclear overhauser effect spectroscopy; HMBC, heteronuclear multiple bond correlation.

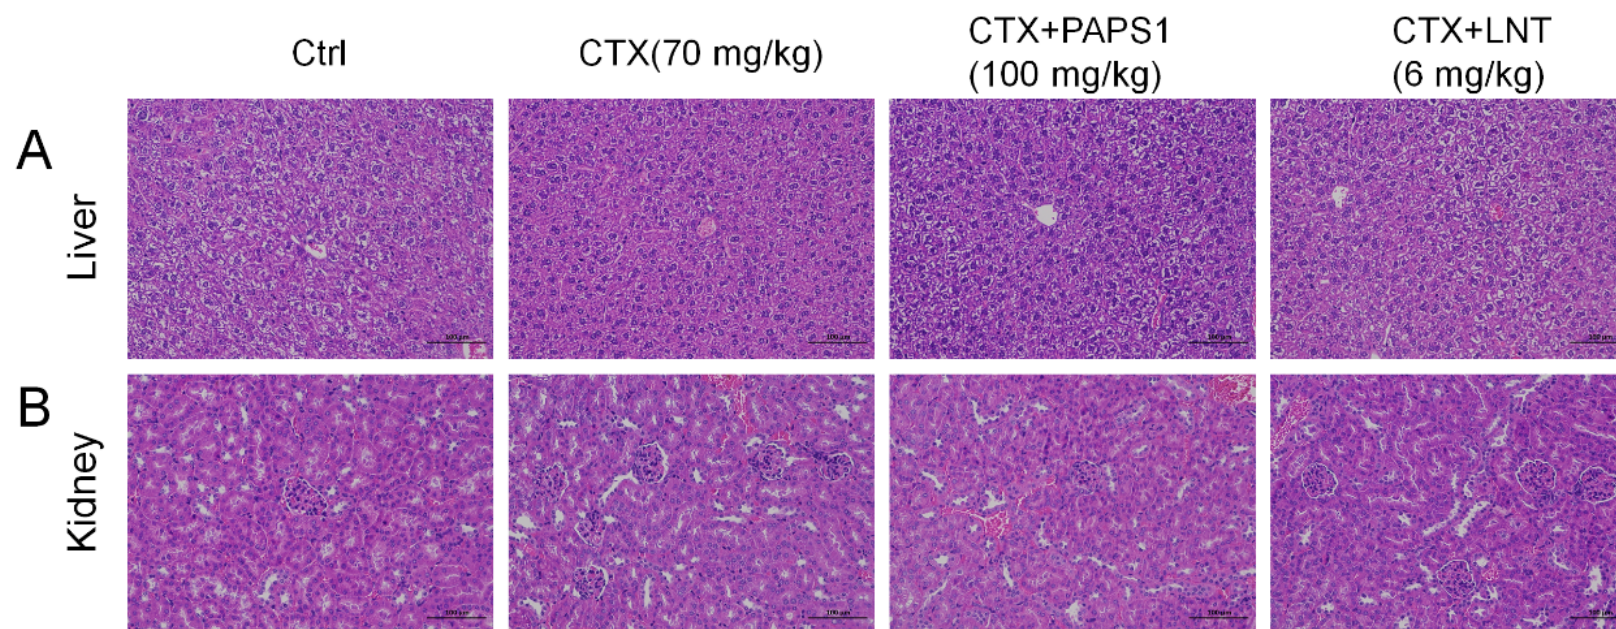

**Figure S3.** PAPS1 showed no histopathological effect on liver and kidney of CTX-injected mice. H&E staining and histopathological observation of (A) liver and (B) kidney (magnification: 200×, scale bar: 100 μm). PAPS1, water-soluble PA polysaccharides; CTX; cyclophosphamide.

**Table S1.** Primary antibodies used for immunohistochemistry staining.

| Name | Item number | Dilution rate | Manufacturer*     |
|------|-------------|---------------|-------------------|
| CD4  | GB11064     | 1:500         | Wuhan Service     |
| CD8  | GB13429     | 1:500         | Wuhan Service     |
| CD19 | GB11061-1   | 1:500         | Wuhan Service     |
| CD56 | GB112671    | 1:500         | Wuhan Service     |
| Nrf2 | GB113808    | 1:500         | Wuhan Service     |
| HO-1 | GB11104     | 1:500         | Wuhan Service     |
| SOD1 | 10269-1-AP  | 1:500         | Proteintech Group |

\*Primary antibodies were all purchased from Wuhan Service Biological Co., Ltd (Wuhan, Hubei Province, China) and Proteintech Group Inc (Wuhan, China). Nrf2, nuclear factor erythroid 2-related factor 2; SOD1, superoxide dis-mutase 1; HO-1, heme oxygenase 1.

**Table S2.** ELISA kits used for biochemical indices assessment.

| Name   | Item number | Manufacturer                                  |
|--------|-------------|-----------------------------------------------|
| IL-2   | ml063136-J  | Shanghai Enzyme-linked Biotechnology Co., Ltd |
| IL-6   | ml002293-J  | Shanghai Enzyme-linked Biotechnology Co., Ltd |
| IL-12  | ml037868    | Shanghai Enzyme-linked Biotechnology Co., Ltd |
| Ig A   | ml037606    | Shanghai Enzyme-linked Biotechnology Co., Ltd |
| IgG    | ml037601    | Shanghai Enzyme-linked Biotechnology Co., Ltd |
| IgM    | ml063597    | Shanghai Enzyme-linked Biotechnology Co., Ltd |
| ROS    | ml009876-1  | Shanghai Enzyme-linked Biotechnology Co., Ltd |
| SOD    | A001-3-2    | Nanjing Jiancheng Bioengineering Institute    |
| GSH-Px | A005-1-2    | Nanjing Jiancheng Bioengineering Institute    |
| MDA    | A003-1-1    | Nanjing Jiancheng Bioengineering Institute    |

IL, interleukin; Ig, immunoglobulin; ROS, reactive oxygen species; GSH-Px, glutathione peroxidase; SOD, superoxide dismutase; MDA, malondialdehyde.

**Table S3.** Molecular characteristics of PAPS1.

| Polydispersity                             |       |
|--------------------------------------------|-------|
| Mw/Mn                                      | 1.104 |
| Mz/Mn                                      | 1.422 |
| Molar mass moments (10 <sup>4</sup> g/mol) |       |
| Mn                                         | 1.555 |
| Mp                                         | 1.478 |
| Mw                                         | 1.716 |
| Mz                                         | 2.211 |

Note: Mn: number-average molecular weight; Mp: peak molecular weight; Mw: weight-average molecular weight; Mz: Z-average molecular weight.

**Table S4.** Effects of PAPS1 on body weight and organ index in 70 mg/kg CTX induced immunosuppressive mice.

|                       |                  | CTX (70mg/kg) |                         |                        |                        |
|-----------------------|------------------|---------------|-------------------------|------------------------|------------------------|
|                       |                  | Ctrl          | Model                   | LNT<br>(6 mg/kg)       | PAPS1<br>(100 mg/kg)   |
| Body weight<br>(g)    | 0                | 22.5±0.4      | 22.6±0.5                | 22.4±0.4               | 22.3±0.5               |
|                       | 7 <sup>th</sup>  | 23.6±0.3      | 20.8±0.3 <sup>###</sup> | 20.9±0.6               | 20.8±0.4               |
|                       | 14 <sup>th</sup> | 24.1±0.4      | 21.2±0.6 <sup>###</sup> | 21.7±0.3 <sup>*</sup>  | 21.4±0.4               |
|                       | 21 <sup>st</sup> | 24.7±0.4      | 21.9±0.6 <sup>###</sup> | 22.4±0.6               | 22.1±0.7               |
|                       | 28 <sup>th</sup> | 25.5±0.5      | 22.2±0.4 <sup>###</sup> | 23.1±0.5 <sup>**</sup> | 22.4±0.8               |
|                       | 35 <sup>th</sup> | 26.0±0.7      | 22.7±0.5 <sup>###</sup> | 23.6±0.6 <sup>**</sup> | 22.9±0.8               |
| Organ index<br>(mg/g) | Spleen           | 3.6±0.2       | 3.5±0.4                 | 3.4±0.2                | 4.1±0.4 <sup>***</sup> |
|                       | Thymus           | 1.5±0.3       | 0.7±0.1 <sup>###</sup>  | 0.7±0.1                | 0.8±0.2                |

Data are present as the mean ± S.D. ( $n = 10$ ) and analyzed via a one-way ANOVA test followed by post-hoc Dunn's multiple comparison tests. <sup>##</sup> $p < 0.01$ , <sup>###</sup> $p < 0.001$ , compared with Ctrl group; <sup>\*</sup> $p < 0.05$ , <sup>\*\*</sup> $p < 0.01$ , <sup>\*\*\*</sup> $p < 0.001$ , compared with Model group. Ctrl, control, CTX, cyclophosphamide; PAPS1, water-soluble PA polysaccharides, LNT, lentinan.



**Table S5.** The number of microbial taxa at different levels of intestinal microflora in mice.

| Group | phylum | class | order | family | genus | species |
|-------|--------|-------|-------|--------|-------|---------|
| Ctrl  | 11     | 18    | 24    | 34     | 37    | 15      |
|       | 10     | 17    | 24    | 33     | 40    | 13      |
|       | 10     | 20    | 29    | 39     | 42    | 14      |
|       | 10     | 19    | 25    | 38     | 37    | 15      |
| Model | 11     | 18    | 26    | 39     | 39    | 19      |
|       | 11     | 20    | 24    | 40     | 43    | 21      |
|       | 11     | 18    | 22    | 36     | 37    | 21      |
|       | 10     | 17    | 21    | 33     | 31    | 13      |
| PAPS1 | 11     | 19    | 23    | 42     | 44    | 22      |
|       | 11     | 17    | 23    | 37     | 39    | 23      |
|       | 9      | 17    | 23    | 43     | 50    | 26      |
|       | 9      | 16    | 25    | 41     | 47    | 20      |
| LNT   | 9      | 16    | 24    | 41     | 44    | 18      |
|       | 8      | 15    | 20    | 34     | 39    | 21      |
|       | 9      | 15    | 19    | 35     | 44    | 18      |
|       | 11     | 18    | 21    | 32     | 34    | 16      |

Ctrl, control, CTX, cyclophosphamide; PAPS1, water-soluble PA polysaccharides, LNT, lentinan.

**Table S6.** The relative abundance of each node of intestinal microflora in mice.

|    | Taxa                                                                                                                      | Abundance<br>(log10) | LDA<br>score | Group |
|----|---------------------------------------------------------------------------------------------------------------------------|----------------------|--------------|-------|
| 1  | Bacteria.Firmicutes.Bacilli.Lactobacillales.Streptococcaceae                                                              | 3.597                |              |       |
| 2  | Bacteria.Firmicutes.Clostridia.Clostridiales.Eubacteriaceae                                                               | 1.270                |              |       |
| 3  | Bacteria.Actinobacteria.Actinobacteria.Actinomycetales.Micromonosporaceae                                                 | 1.099                |              |       |
| 4  | Bacteria.Proteobacteria.Alphaproteobacteria.Rhizobiales.Brucellaceae.Ochrobactrum                                         | 0.950                |              |       |
| 5  | Bacteria.Firmicutes.Clostridia.Clostridiales.Clostridiaceae.Candidatus_Arthromitus                                        | 2.174                |              |       |
| 6  | Bacteria.Proteobacteria.Betaproteobacteria.Burkholderiales.Comamonadaceae.Curvibacter                                     | 1.596                |              |       |
| 7  | Bacteria.Actinobacteria.Actinobacteria.Actinomycetales.Micrococcaceae.Arthrobacter                                        | 1.792                |              |       |
| 8  | Bacteria.Proteobacteria.Gammaproteobacteria.Xanthomonadales.Xanthomonadaceae.Stenotrophomonas.Stenotrophomonas_geniculata | 1.196                |              |       |
| 9  | Bacteria.Acidobacteria.Sva0725                                                                                            | 0.880                |              |       |
| 10 | Bacteria.Firmicutes.Clostridia.Clostridiales.Dehalobacteriaceae                                                           | 3.779                |              |       |
| 11 | Bacteria.Proteobacteria.Betaproteobacteria.Rhodocyclales.Rhodocyclaceae.Azoarcus                                          | 1.424                |              |       |
| 12 | Bacteria.Acidobacteria._Chloracidobacteria_                                                                               | 1.204                |              |       |
| 13 | Bacteria.Proteobacteria.Alphaproteobacteria.Rhizobiales.Phylobacteriaceae                                                 | 0.943                |              |       |
| 14 | Bacteria.Firmicutes.Bacilli.Bacillales.Bacillaceae.Bacillus                                                               | 1.686                |              |       |
| 15 | Bacteria.Firmicutes.Clostridia.Clostridiales.Dehalobacteriaceae.Dehalobacterium                                           | 3.779                |              |       |
| 16 | Bacteria.Bacteroidetes                                                                                                    | 5.706                |              |       |
| 17 | Bacteria.Bacteroidetes.Bacteroidia.Bacteroidales.Porphyromonadaceae.Macellibacteroides.Macellibacteroides_fermentans      | 0.798                |              |       |
| 18 | Bacteria.Firmicutes.Bacilli.Bacillales.Planococcaceae                                                                     | 1.826                |              |       |
| 19 | Bacteria.Chloroflexi.Anaerolineae.Ardenscatenales.Ardenscatenaceae.Ardenscatena                                           | 1.099                |              |       |
| 20 | Bacteria.Firmicutes.Bacilli.Lactobacillales.Lactobacillaceae.Lactobacillus.Lactobacillus_iners                            | 1.196                |              |       |
| 21 | Bacteria.Firmicutes.Clostridia.Clostridiales.Ruminococcaceae                                                              | 4.763                |              |       |
| 22 | Bacteria.Firmicutes.Erysipelotrichi.Erysipelotrichales.Erysipelotrichaceae.Clostridium.Clostridium_cocleatum              | 2.090                |              |       |

|    |                                                                                                                         |              |                     |                         |
|----|-------------------------------------------------------------------------------------------------------------------------|--------------|---------------------|-------------------------|
| 23 | Bacteria.Firmicutes.Bacilli.Lactobacillales.Lactobacillaceae.Lactobacillus                                              | 5.359        |                     |                         |
| 24 | Bacteria.Deferribacteres                                                                                                | 4.715        |                     |                         |
| 25 | <b>Bacteria.Firmicutes.Erysipelotrichi.Erysipelotrichales</b>                                                           | <b>3.714</b> | <b>3.362<br/>18</b> | <b>0 mg/kg<br/>PAP</b>  |
| 26 | Bacteria.Cyanobacteria.Synechococcophycideae.Synechococcales                                                            | 0.947        |                     |                         |
| 27 | Bacteria.Proteobacteria.Alphaproteobacteria.Sphingomonadales.Sphingomonadaceae.Sphingopyxis                             | 0.872        |                     |                         |
| 28 | Bacteria.Firmicutes.Clostridia.Clostridiales.Ruminococcaceae.Butyricicoccus.Butyricicoccus_pullicaecorum                | 2.961        |                     |                         |
| 29 | Bacteria.Proteobacteria.Gammaproteobacteria.Pseudomonadales.Moraxellaceae.Acinetobacter.Acinetobacter_rh<br>izosphaerae | 2.059        |                     |                         |
| 30 | Bacteria.Acidobacteria.Sva0725.Sva0725                                                                                  | 0.880        |                     |                         |
| 31 | Bacteria.Proteobacteria.Betaproteobacteria.Methylophilales.Methylophilaceae                                             | 1.345        |                     |                         |
| 32 | Bacteria.Firmicutes.Clostridia.Clostridiales.Ruminococcaceae.Butyricicoccus                                             | 2.961        |                     |                         |
| 33 | Bacteria.Proteobacteria.Deltaproteobacteria.Bdellovibrionales                                                           | 0.903        |                     |                         |
| 34 | Bacteria.OD1                                                                                                            | 0.798        |                     |                         |
| 35 | Bacteria.Proteobacteria.Gammaproteobacteria.Pasteurellales                                                              | 1.391        |                     |                         |
| 36 | Bacteria.Proteobacteria.Gammaproteobacteria.Enterobacteriales                                                           | 2.056        |                     |                         |
| 37 | Bacteria.Synergistetes.Synergistia.Synergistales.Synergistaceae                                                         | 0.965        |                     |                         |
| 38 | Bacteria.Proteobacteria.Gammaproteobacteria.Pseudomonadales.Moraxellaceae.Acinetobacter                                 | 2.513        |                     |                         |
| 39 | Bacteria.Bacteroidetes.Bacteroidia.Bacteroidales.Rikenellaceae.Alistipes.Alistipes_massiliensis                         | 3.530        |                     |                         |
| 40 | <b>Bacteria.Firmicutes.Clostridia.Clostridiales.Ruminococcaceae.Ruminococcus</b>                                        | <b>4.158</b> | <b>3.697<br/>03</b> | <b>0 mg/kg<br/>PAP</b>  |
| 41 | Bacteria.Bacteroidetes.Bacteroidia.Bacteroidales.Rikenellaceae.AF12                                                     | 3.614        |                     |                         |
| 42 | Bacteria.Firmicutes.Clostridia.Clostridiales.Ruminococcaceae.Oscillospira                                               | 4.507        |                     |                         |
| 43 | Bacteria.Proteobacteria.Alphaproteobacteria.Rhizobiales                                                                 | 1.620        |                     |                         |
| 44 | Bacteria.Planctomycetes.Phycisphaerae.AKAU3564                                                                          | 0.823        |                     |                         |
| 45 | Bacteria.Planctomycetes.Phycisphaerae                                                                                   | 0.823        |                     |                         |
| 46 | Bacteria.Proteobacteria.Alphaproteobacteria.Rhodospirillales.Acetobacteraceae                                           | 2.135        |                     |                         |
| 47 | Bacteria.Proteobacteria.Deltaproteobacteria.Desulfovibrionales                                                          | 4.400        |                     |                         |
| 48 | Bacteria.Proteobacteria.Betaproteobacteria.Burkholderiales.Oxalobacteraceae                                             | 1.342        |                     |                         |
| 49 | <b>Bacteria.Proteobacteria.Epsilonproteobacteria</b>                                                                    | <b>4.190</b> | <b>3.834<br/>57</b> | <b>70 mg/kg<br/>CTX</b> |

|    |                                                                                                                      |       |
|----|----------------------------------------------------------------------------------------------------------------------|-------|
| 50 | Bacteria.Proteobacteria.Gammaproteobacteria.Xanthomonadales.Xanthomonadaceae.Thermomonas_fusca                       | 1.830 |
| 51 | Bacteria.Actinobacteria.Acidimicrobiia.Acidimicrobiales                                                              | 0.903 |
| 52 | Bacteria.Proteobacteria.Betaproteobacteria.Burkholderiales.Burkholderiaceae                                          | 1.148 |
| 53 | Bacteria.Chlamydiae.Chlamydiia                                                                                       | 0.903 |
| 54 | Bacteria.Proteobacteria.Gammaproteobacteria.Enterobacteriales.Enterobacteriaceae.Serratia                            | 1.139 |
| 55 | Bacteria.Proteobacteria.Deltaproteobacteria.Myxococcales.Myxococcaceae.Anaeromyxobacter                              | 1.573 |
| 56 | Bacteria.Proteobacteria.Gammaproteobacteria.Legionellales                                                            | 1.244 |
| 57 | Bacteria.Deferribacteres.Deferribacteres.Deferribacterales.Deferribacteraceae                                        | 4.715 |
| 58 | Bacteria.Actinobacteria.Actinobacteria.Actinomycetales.Intrasporangiaceae                                            | 1.139 |
| 59 | Bacteria.Firmicutes.Bacilli.Lactobacillales.Lactobacillaceae.Pediococcus.Pediococcus_cellicola                       | 1.424 |
| 60 | Bacteria.Proteobacteria.Gammaproteobacteria.Enterobacteriales.Enterobacteriaceae.Pantoea                             | 1.332 |
| 61 | Bacteria.Proteobacteria.Betaproteobacteria.MND1                                                                      | 1.173 |
| 62 | Bacteria.Verrucomicrobia.Verrucomicrobiae.Verrucomicrobiales.Verrucomicrobiaceae.Akkermansia.Akkermansia_muciniphila | 2.563 |
| 63 | Bacteria.Firmicutes.Bacilli.Bacillales.Staphylococcaceae.Staphylococcus.Staphylococcus_sciuri                        | 2.213 |
| 64 | Bacteria.Bacteroidetes.Bacteroidia.Bacteroidales.S24_7                                                               | 5.533 |
| 65 | Bacteria.Bacteroidetes.Bacteroidia.Bacteroidales.Rikenellaceae                                                       | 5.241 |
| 66 | Bacteria.Proteobacteria.Gammaproteobacteria.Pseudomonadales.Pseudomonadaceae                                         | 2.583 |
| 67 | Bacteria.Proteobacteria.Gammaproteobacteria.Pseudomonadales.Pseudomonadaceae.Pseudomonas                             | 2.583 |
| 68 | Bacteria.Proteobacteria.Gammaproteobacteria.Alteromonadales.Alteromonadaceae.Marinobacter.Marinobacter_bryozorum     | 1.144 |
| 69 | Bacteria.Proteobacteria.Alphaproteobacteria.Rhizobiales.Bradyrhizobiaceae.Balneimonas                                | 0.843 |
| 70 | Bacteria.Firmicutes.Bacilli.Lactobacillales.Lactobacillaceae.Lactobacillus.Lactobacillus_salivarius                  | 1.196 |
| 71 | Bacteria.Actinobacteria.Actinobacteria.Bifidobacteriales.Bifidobacteriaceae.Bifidobacterium.Bifidobacterium_longum   | 1.521 |
| 72 | Bacteria.Proteobacteria.Alphaproteobacteria.Rhizobiales.Rhizobiaceae.Agrobacterium                                   | 1.475 |
| 73 | Bacteria.Proteobacteria.Gammaproteobacteria.Xanthomonadales.Xanthomonadaceae.Arenimonas                              | 1.241 |
| 74 | Bacteria.Proteobacteria.Betaproteobacteria.Procabbacteriales                                                         | 0.823 |
| 75 | Bacteria.Plantomycetes.Phycisphaerae.Phycisphaerales                                                                 | 0.798 |
| 76 | Bacteria.Proteobacteria.Alphaproteobacteria.Rhodospirillales.Rhodospirillaceae.Skermanella                           | 0.965 |

|     |                                                                                                                     |              |              |                 |
|-----|---------------------------------------------------------------------------------------------------------------------|--------------|--------------|-----------------|
| 77  | Bacteria.Bacteroidetes.Bacteroidia.Bacteroidales.Bacteroidaceae.Bacteroides                                         | 4.458        |              |                 |
| 78  | Bacteria.Firmicutes.Clostridia.Clostridiales._Mogibacteriaceae_                                                     | 3.327        |              |                 |
| 79  | Bacteria.Actinobacteria.Actinobacteria.Bifidobacteriales.Bifidobacteriaceae                                         | 2.351        |              |                 |
| 80  | Bacteria.Proteobacteria.Gammaproteobacteria.Alteromonadales.Alteromonadaceae.HB2_32_21                              | 1.901        |              |                 |
| 81  | <b>Bacteria.Firmicutes.Bacilli.Lactobacillales.Streptococcaceae.Streptococcus</b>                                   | <b>2.910</b> | <b>2.533</b> | <b>0 mg/kg</b>  |
| 82  | Bacteria.Chlamydiae.Chlamydiia.Chlamydiales.Chlamydiaceae.Chlamydia                                                 | 0.903        | <b>62</b>    | <b>PAP</b>      |
| 83  | Bacteria.Actinobacteria.Rubrobacteria.Rubrobacterales.Rubrobacteraceae                                              | 0.872        |              |                 |
| 84  | Bacteria.Bacteroidetes.Flavobacteriia.Flavobacteriales._Weeksellaceae_                                              | 0.798        |              |                 |
| 85  | Bacteria.Proteobacteria.Betaproteobacteria.Rhodocyclales.Rhodocyclaceae.Dok59                                       | 1.099        |              |                 |
| 86  | Bacteria.Firmicutes.Clostridia.Clostridiales.Lachnospiraceae.Roseburia.Roseburia_faecis                             | 2.270        |              |                 |
| 87  | Bacteria.Proteobacteria.Betaproteobacteria.Burkholderiales.Comamonadaceae.Aquabacterium                             | 1.855        |              |                 |
| 88  | Bacteria.Proteobacteria.Gammaproteobacteria.Pseudomonadales                                                         | 2.850        |              |                 |
| 89  | Bacteria.Firmicutes.Bacilli.Bacillales.Thermoactinomycetaceae.Thermoactinomyces.Thermoactinomyces_sanguinis         | 1.725        |              |                 |
| 90  | Bacteria.Bacteroidetes.Bacteroidia.Bacteroidales._Paraprevotellaceae_.YRC22                                         | 1.148        |              |                 |
| 91  | Bacteria.Spirochaetes.Spirochaetes                                                                                  | 0.823        |              |                 |
| 92  | Bacteria.Actinobacteria.Actinobacteria.Actinomycetales                                                              | 2.293        |              |                 |
| 93  | Bacteria.Firmicutes.Clostridia.Clostridiales.Lachnospiraceae.Dorea                                                  | 2.494        |              |                 |
| 94  | <b>Bacteria.Proteobacteria.Epsilonproteobacteria.Campylobacteriales.Helicobacteraceae.Helicobacter</b>              | <b>4.190</b> | <b>3.838</b> | <b>70 mg/kg</b> |
| 95  | Bacteria.Firmicutes.Clostridia.Clostridiales.Christensenellaceae                                                    | 1.924        | <b>15</b>    | <b>CTX</b>      |
| 96  | Bacteria.Proteobacteria.Alphaproteobacteria.Rhodospirillales.Rhodospirillaceae.Phaeospirillum.Phaeospirillum_fulvum | 1.357        |              |                 |
| 97  | Bacteria.Actinobacteria.Coriobacteriia.Coriobacteriales.Coriobacteriaceae.Adlercreutzia                             | 3.691        |              |                 |
| 98  | Bacteria.Spirochaetes                                                                                               | 0.823        |              |                 |
| 99  | Bacteria.Synergistetes.Synergistia                                                                                  | 0.965        |              |                 |
| 100 | Bacteria.Proteobacteria.Betaproteobacteria.Burkholderiales.Comamonadaceae                                           | 2.162        |              |                 |
| 101 | Bacteria.Actinobacteria.Rubrobacteria.Rubrobacterales.Rubrobacteraceae.Rubrobacter                                  | 0.872        |              |                 |
| 102 | Bacteria.Actinobacteria.Actinobacteria.Bifidobacteriales.Bifidobacteriaceae.Bifidobacterium                         | 2.246        |              |                 |

|     |                                                                                                                        |              |              |                 |
|-----|------------------------------------------------------------------------------------------------------------------------|--------------|--------------|-----------------|
| 103 | <b>Bacteria.Proteobacteria.Epsilonproteobacteria.Campylobacterales.Helicobacteraceae</b>                               | <b>4.190</b> | <b>3.787</b> | <b>70 mg/kg</b> |
|     |                                                                                                                        |              | <b>03</b>    | <b>CTX</b>      |
| 104 | Bacteria.Proteobacteria.Betaproteobacteria.Rhodocyclales.Rhodocyclaceae.KD1_23                                         | 1.760        |              |                 |
| 105 | Bacteria.Firmicutes.Clostridia.Clostridiales.Clostridiaceae.Clostridium.Clostridium_gasigenes                          | 1.420        |              |                 |
| 106 | <b>Bacteria.Firmicutes.Erysipelotrichi.Erysipelotrichales.Erysipelotrichaceae</b>                                      | <b>3.714</b> | <b>3.378</b> | <b>0 mg/kg</b>  |
|     |                                                                                                                        |              | <b>76</b>    | <b>PAP</b>      |
| 107 | Bacteria.Proteobacteria.Betaproteobacteria.Hydrogenophilales.Hydrogenophilaceae.Thiobacillus                           | 2.313        |              |                 |
| 108 | Bacteria.Proteobacteria.Gammaproteobacteria.Legionellales.Coxiellaceae.Rickettsiella                                   | 1.244        |              |                 |
| 109 | Bacteria.Gemmatimonadetes.Gemm_1                                                                                       | 1.090        |              |                 |
| 110 | Bacteria.Firmicutes.Bacilli.Lactobacillales.Lactobacillaceae.Lactobacillus.Lactobacillus_zeae                          | 2.292        |              |                 |
| 111 | Bacteria.Proteobacteria.Gammaproteobacteria.Oceanospirillales.Halomonadaceae                                           | 1.683        |              |                 |
| 112 | Bacteria.Chloroflexi.Thermomicrobia                                                                                    | 1.350        |              |                 |
| 113 | Bacteria.TM7.TM7_3                                                                                                     | 3.482        |              |                 |
| 114 | Bacteria.Spirochaetes.Spirochaetes.Spirochaetales.Spirochaetaceae.Treponema                                            | 0.823        |              |                 |
| 115 | Bacteria.Chloroflexi.Anaerolineae.Caldilineales.Caldilineaceae                                                         | 0.998        |              |                 |
| 116 | Bacteria.Firmicutes.Clostridia.Clostridiales.Ruminococcaceae.Gemmiger                                                  | 0.789        |              |                 |
| 117 | Bacteria.Firmicutes.Clostridia.Clostridiales.Lachnospiraceae._Ruminococcus_. _Ruminococcus__torques                    | 1.925        |              |                 |
| 118 | Bacteria.Firmicutes.Bacilli.Lactobacillales.Streptococcaceae.Streptococcus.Streptococcus_alactolyticus                 | 1.341        |              |                 |
| 119 | Bacteria.Firmicutes.Clostridia.Clostridiales.Peptostreptococcaceae                                                     | 1.341        |              |                 |
| 120 | Bacteria.Spirochaetes.Spirochaetes.Spirochaetales                                                                      | 0.823        |              |                 |
| 121 | Bacteria.Proteobacteria.Gammaproteobacteria.Oceanospirillales.Halomonadaceae.Halomonas.Halomonas_nitritophilus         | 1.174        |              |                 |
| 122 | Bacteria.Verrucomicrobia                                                                                               | 2.563        |              |                 |
| 123 | Bacteria.TM7.TM7_3.CW040                                                                                               | 3.482        |              |                 |
| 124 | Bacteria.Proteobacteria.Alphaproteobacteria.Rhodospirillales.Acetobacteraceae.Acetobacter                              | 2.135        |              |                 |
| 125 | Bacteria.Firmicutes.Clostridia.Clostridiales.Lachnospiraceae.Clostridium.Clostridium_colinum                           | 1.447        |              |                 |
| 126 | Bacteria.Chlorobi.Ignavibacteria.Ignavibacteriales.Ignavibacteriaceae                                                  | 0.947        |              |                 |
| 127 | Bacteria.Proteobacteria.Deltaproteobacteria.Desulfovibrionales.Desulfovibrionaceae.Desulfovibrio.Desulfovibrio_C21_c20 | 4.344        |              |                 |
| 128 | Bacteria.Proteobacteria.Gammaproteobacteria.Pseudomonadales.Moraxellaceae.Alkanindiges.Alkanindiges_illi<br>noisensis  | 1.119        |              |                 |

|     |                                                                                                             |       |
|-----|-------------------------------------------------------------------------------------------------------------|-------|
| 129 | Bacteria.Firmicutes.Bacilli.Lactobacillales.Aerococcaceae                                                   | 2.238 |
| 130 | Bacteria.Tenericutes.Mollicutes.Anaeroplasmatales                                                           | 2.900 |
| 131 | Bacteria.Proteobacteria.Epsilonproteobacteria.Campylobacteriales.Helicobacteraceae.Flexispira               | 1.014 |
| 132 | Bacteria.Chloroflexi.Anaerolineae.Ardenscatenales                                                           | 1.099 |
| 133 | Bacteria.Verrucomicrobia.Verrucomicrobiae.Verrucomicrobiales.Verrucomicrobiaceae                            | 2.563 |
| 134 | Bacteria.Proteobacteria                                                                                     | 4.599 |
| 135 | Bacteria.Actinobacteria.Actinobacteria.Actinomycetales.Microbacteriaceae                                    | 1.776 |
| 136 | Bacteria.Bacteroidetes.Bacteroidia.Bacteroidales.Bacteroidaceae                                             | 4.458 |
| 137 | Bacteria.Proteobacteria.Gammaproteobacteria.Xanthomonadales.Xanthomonadaceae.Stenotrophomonas               | 1.196 |
| 138 | Bacteria.OD1.ABY1                                                                                           | 0.798 |
| 139 | Bacteria.Actinobacteria.Acidimicrobiia.Acidimicrobiales.C111                                                | 0.903 |
| 140 | Bacteria.Chloroflexi.Anaerolineae.Ardenscatenales.Ardenscatenaceae                                          | 1.099 |
| 141 | Bacteria.Proteobacteria.Alphaproteobacteria.Rhizobiales.Rhizobiaceae                                        | 1.475 |
| 142 | Bacteria.Proteobacteria.Alphaproteobacteria.Rhodobacterales                                                 | 1.119 |
| 143 | Bacteria.Proteobacteria.Alphaproteobacteria.Rhizobiales.Bradyrhizobiaceae                                   | 1.144 |
| 144 | Bacteria.Proteobacteria.Alphaproteobacteria.Sphingomonadales.Sphingomonadaceae.Kaistobacter                 | 1.204 |
| 145 | Bacteria.Proteobacteria.Betaproteobacteria.Nitrosomonadales                                                 | 1.099 |
| 146 | Bacteria.Proteobacteria.Betaproteobacteria.Burkholderiales.Alcaligenaceae                                   | 2.879 |
| 147 | Bacteria.Firmicutes.Bacilli.Lactobacillales.Enterococcaceae.Enterococcus.Enterococcus_sulfureus             | 0.823 |
| 148 | Bacteria.Proteobacteria.Alphaproteobacteria.Rhodobacterales.Hyphomonadaceae                                 | 0.798 |
| 149 | Bacteria.Bacteroidetes.Bacteroidia.Bacteroidales.Rikenellaceae.Alistipes.Alistipes_putredinis               | 1.014 |
| 150 | Bacteria.Proteobacteria.Alphaproteobacteria.Rhodospirillales.Rhodospirillaceae.Dongia.Dongia_mobilis        | 1.315 |
| 151 | Bacteria.Verrucomicrobia.Verruco_5                                                                          | 0.903 |
| 152 | Bacteria.Proteobacteria.Betaproteobacteria.Burkholderiales.Comamonadaceae.Rubrivivax.Rubrivivax_gelatinosus | 1.486 |
| 153 | Bacteria.Bacteroidetes.Bacteroidia.Bacteroidales.Rikenellaceae.Alistipes.Alistipes_indistinctus             | 2.897 |
| 154 | Bacteria.Proteobacteria.Alphaproteobacteria.Rhizobiales.Brucellaceae                                        | 0.950 |
| 155 | Bacteria.Chloroflexi.Anaerolineae.Caldilineales                                                             | 0.998 |
| 156 | Bacteria.OP8.OP8_1                                                                                          | 1.119 |
| 157 | Bacteria.Proteobacteria.Deltaproteobacteria.Bdellovibrionales.Bacteriovoracaceae.Peredibacter               | 0.903 |

|            |                                                                                                                |              |                     |                                 |
|------------|----------------------------------------------------------------------------------------------------------------|--------------|---------------------|---------------------------------|
| 158        | Bacteria.Firmicutes.Bacilli.Bacillales.Staphylococcaceae.Jeotgalicoccus.Jeotgalicoccus_psychrophilus           | 2.098        |                     |                                 |
| 159        | Bacteria.Firmicutes.Clostridia.Clostridiales.Lachnospiraceae.Lactonifactor.Lactonifactor_longoviformis         | 0.943        |                     |                                 |
| 160        | Bacteria.Proteobacteria.Gammaproteobacteria.Xanthomonadales.Xanthomonadaceae                                   | 1.897        |                     |                                 |
| 161        | Bacteria.Tenericutes.Mollicutes.RF39                                                                           | 2.779        |                     |                                 |
| 162        | Bacteria.Tenericutes.RF3.ML615J_28                                                                             | 0.774        |                     |                                 |
| 163        | Bacteria.Cyanobacteria.4C0d_2.YS2                                                                              | 2.091        |                     |                                 |
| 164        | Bacteria.Firmicutes.Clostridia.Clostridiales.Ruminococcaceae.Faecalibacterium.Faecalibacterium_prausnitzii     | 2.405        |                     |                                 |
| 165        | Bacteria.Tenericutes.RF3                                                                                       | 0.774        |                     |                                 |
| <b>166</b> | <b>Bacteria.Firmicutes.Clostridia.Clostridiales.Lachnospiraceae.Clostridium</b>                                | <b>3.201</b> | <b>2.703<br/>63</b> | <b>CTX+<br/>6 mg/kg<br/>LEP</b> |
| 167        | Bacteria.Proteobacteria.Gammaproteobacteria.Xanthomonadales.Xanthomonadaceae.Arenimonas.Arenimonas_oryziterrae | 1.241        |                     |                                 |
| 168        | Bacteria.Proteobacteria.Betaproteobacteria.Methylophilales                                                     | 1.345        |                     |                                 |
| 169        | Bacteria.Proteobacteria.Gammaproteobacteria.Xanthomonadales                                                    | 1.995        |                     |                                 |
| 170        | Bacteria.Firmicutes.Clostridia.Clostridiales.Lachnospiraceae.Roseburia                                         | 3.285        |                     |                                 |
| 171        | Bacteria.Proteobacteria.Alphaproteobacteria.Rhodobacterales.Rhodobacteraceae                                   | 1.119        |                     |                                 |
| 172        | Bacteria.Firmicutes.Clostridia.Clostridiales.Clostridiaceae.Clostridium.Clostridium_perfringens                | 1.578        |                     |                                 |
| 173        | Bacteria.Proteobacteria.TA18                                                                                   | 0.823        |                     |                                 |
| 174        | Bacteria.Acidobacteria._Chloracidobacteria_.RB41                                                               | 0.798        |                     |                                 |
| 175        | Bacteria.Proteobacteria.Alphaproteobacteria                                                                    | 2.300        |                     |                                 |
| 176        | Bacteria.Proteobacteria.Alphaproteobacteria.Rhodospirillales.Rhodospirillaceae                                 | 1.756        |                     |                                 |
| 177        | Bacteria.Proteobacteria.Alphaproteobacteria.Rhizobiales.Xanthobacteraceae                                      | 1.014        |                     |                                 |
| 178        | Bacteria.Actinobacteria.Acidimicrobiia                                                                         | 0.903        |                     |                                 |
| <b>179</b> | <b>Bacteria.Chloroflexi.Anaerolineae.SBR1031</b>                                                               | <b>2.030</b> | <b>2.738<br/>23</b> | <b>70 mg/kg<br/>CTX</b>         |
| 180        | Bacteria.Firmicutes.Bacilli.Bacillales.Bacillaceae                                                             | 1.686        |                     |                                 |
| 181        | Bacteria.Proteobacteria.Deltaproteobacteria.Bdellovibrionales.Bacteriovoracaceae                               | 0.903        |                     |                                 |
| 182        | Bacteria.Proteobacteria.Betaproteobacteria                                                                     | 2.935        |                     |                                 |



|     |                                                                                                                               |              |              |                 |
|-----|-------------------------------------------------------------------------------------------------------------------------------|--------------|--------------|-----------------|
| 183 | Bacteria.Proteobacteria.Deltaproteobacteria.Desulfovibrionales.Desulfovibrionaceae.Desulfovibrio.Desulfovibri<br>o_alaskensis | 1.267        |              |                 |
| 184 | Bacteria.Actinobacteria.Actinobacteria.Actinomycetales.Microbacteriaceae.Cryocola                                             | 1.776        |              |                 |
| 185 | Bacteria.Chloroflexi.Anaerolineae.S0208                                                                                       | 0.789        |              |                 |
| 186 | Bacteria.Proteobacteria.Alphaproteobacteria.Caulobacterales.Caulobacteraceae                                                  | 1.048        |              |                 |
| 187 | Bacteria.Bacteroidetes.Bacteroidia.Bacteroidales._Paraprevotellaceae_.CF231                                                   | 1.172        |              |                 |
| 188 | Bacteria.Proteobacteria.Alphaproteobacteria.Rhizobiales.Xanthobacteraceae.Labrys                                              | 1.014        |              |                 |
| 189 | Bacteria.Proteobacteria.Betaproteobacteria.Ellin6067                                                                          | 1.320        |              |                 |
| 190 | Bacteria.Firmicutes.Clostridia.Clostridiales.Veillonellaceae.Dialister                                                        | 0.798        |              |                 |
| 191 | <b>Bacteria.Chloroflexi.Anaerolineae.SBR1031.A4b</b>                                                                          | <b>1.409</b> | <b>3.300</b> | <b>70 mg/kg</b> |
| 192 | Bacteria.Actinobacteria.Thermoleophilia.Gaiellales.Gaiellaceae                                                                | 0.872        | <b>24</b>    | <b>CTX</b>      |
| 193 | Bacteria.Gemmatimonadetes.Gemmatimonadetes.Gemmatimonadales.Ellin5301                                                         | 0.798        |              |                 |
| 194 | Bacteria.Firmicutes                                                                                                           | 5.756        |              |                 |
| 195 | Bacteria.Firmicutes.Clostridia.Clostridiales.Lachnospiraceae.Blautia                                                          | 2.445        |              |                 |
| 196 | Bacteria.Planctomycetes._Brocadiae_.Brocadiales.Brocadiaceae                                                                  | 1.673        |              |                 |
| 197 | Bacteria.Chloroflexi.S085                                                                                                     | 0.867        |              |                 |
| 198 | Bacteria.Cyanobacteria.Synechococcophycideae.Synechococcales.Synechococcaceae.Synechococcus                                   | 0.947        |              |                 |
| 199 | Bacteria.Proteobacteria.Alphaproteobacteria.Caulobacterales                                                                   | 1.048        |              |                 |
| 200 | Bacteria.Firmicutes.Clostridia.Clostridiales.Lachnospiraceae                                                                  | 5.282        |              |                 |
| 201 | Bacteria.Bacteroidetes.Bacteroidia.Bacteroidales.Porphyromonadaceae.Parabacteroides                                           | 2.572        |              |                 |
| 202 | Bacteria.Proteobacteria.Gammaproteobacteria.Alteromonadales                                                                   | 1.901        |              |                 |
| 203 | Bacteria.Firmicutes.Bacilli.Bacillales.Planococcaceae.Staphylococcus.Staphylococcus_saprophyticus                             | 1.604        |              |                 |
| 204 | Bacteria.Proteobacteria.Gammaproteobacteria.Xanthomonadales.Sinobacteraceae                                                   | 1.300        |              |                 |
| 205 | Bacteria.Deferribacteres.Deferribacteres.Deferribacterales.Deferribacteraceae.Mucispirillum.Mucispirillum_scha<br>edleri      | 4.715        |              |                 |
| 206 | Bacteria.Chlamydiae.Chlamydiia.Chlamydiales.Chlamydiaceae                                                                     | 0.903        |              |                 |
| 207 | Bacteria.Proteobacteria.Betaproteobacteria.Nitrosomonadales.Nitrosomonadaceae.Nitrosomonas.Nitrosomonas<br>_europaea          | 1.099        |              |                 |
| 208 | Bacteria.Proteobacteria.Deltaproteobacteria.Myxococcales.Haliangiaceae                                                        | 0.873        |              |                 |
| 209 | Bacteria.Chlamydiae                                                                                                           | 0.903        |              |                 |

|     |                                                                                                                           |              |                     |                                   |
|-----|---------------------------------------------------------------------------------------------------------------------------|--------------|---------------------|-----------------------------------|
| 210 | Bacteria.Bacteroidetes.Flavobacteriia                                                                                     | 0.798        |                     |                                   |
| 211 | Bacteria.Cyanobacteria.ML635J_21                                                                                          | 0.880        |                     |                                   |
| 212 | Bacteria.Bacteroidetes.Bacteroidia.Bacteroidales.Bacteroidaceae.Bacteroides.Bacteroides_uniformis                         | 1.265        |                     |                                   |
| 213 | Bacteria.Planctomycetes.Planctomycetia                                                                                    | 1.111        |                     |                                   |
| 214 | Bacteria.Proteobacteria.Gammaproteobacteria.Enterobacteriales.Enterobacteriaceae                                          | 2.056        |                     |                                   |
| 215 | Bacteria.Cyanobacteria.Synechococcophycideae                                                                              | 0.947        |                     |                                   |
| 216 | Bacteria.Firmicutes.Bacilli.Bacillales.Staphylococcaceae.Staphylococcus                                                   | 3.313        |                     |                                   |
| 217 | Bacteria.Deferribacteres.Deferribacteres                                                                                  | 4.715        |                     |                                   |
| 218 | Bacteria.Actinobacteria.Actinobacteria.Bifidobacteriales                                                                  | 2.351        |                     |                                   |
| 219 | Bacteria.Acidobacteria.Acidobacteria_6.iii1_15                                                                            | 1.123        |                     |                                   |
| 220 | Bacteria.TM7.TM7_3.CW040.F16                                                                                              | 3.482        |                     |                                   |
| 221 | Bacteria.Proteobacteria.Deltaproteobacteria.Myxococcales.Myxococcaceae                                                    | 1.573        |                     |                                   |
| 222 | Bacteria.Actinobacteria.Coriobacteriia                                                                                    | 3.711        |                     |                                   |
| 223 | Bacteria.Proteobacteria.Deltaproteobacteria.Desulfovibrionales.Desulfovibrionaceae.Desulfovibrio                          | 4.387        |                     |                                   |
| 224 | Bacteria.Bacteroidetes.Flavobacteriia.Flavobacteriales._Weeksellaceae_.Chryseobacterium                                   | 0.798        |                     |                                   |
| 225 | Bacteria                                                                                                                  | 6.000        |                     |                                   |
| 226 | Bacteria.Cyanobacteria.4C0d_2                                                                                             | 2.091        |                     |                                   |
| 227 | Bacteria.Gemmatimonadetes                                                                                                 | 1.336        |                     |                                   |
| 228 | Bacteria.Proteobacteria.Gammaproteobacteria.Xanthomonadales.Xanthomonadaceae.Pseudoxanthomonas.Pseudoxanthomonas_mexicana | 1.056        |                     |                                   |
| 229 | Bacteria.Proteobacteria.Deltaproteobacteria                                                                               | 4.400        |                     |                                   |
| 230 | <b>Bacteria.Bacteroidetes.Bacteroidia.Bacteroidales._Paraprevotellaceae_.Paraprevotella</b>                               | <b>2.711</b> | <b>2.460<br/>90</b> | <b>CTX+<br/>100 mg/kg<br/>PAP</b> |
| 231 | Bacteria.Proteobacteria.Gammaproteobacteria.Alteromonadales.Alteromonadaceae.Marinobacter                                 | 1.144        |                     |                                   |
| 232 | Bacteria.Proteobacteria.Gammaproteobacteria.Xanthomonadales.Xanthomonadaceae.Aquimonas                                    | 1.827        |                     |                                   |
| 233 | Bacteria.Bacteroidetes.Bacteroidia.Bacteroidales._Odoribacteraceae_                                                       | 4.185        | 3.653<br>41         | <b>0 mg/kg<br/>PAP</b>            |
| 234 | Bacteria.Proteobacteria.Gammaproteobacteria.Pseudomonadales.Moraxellaceae.Perlucidibaca                                   | 1.952        | 2.410<br>40         | <b>0 mg/kg<br/>PAP</b>            |
| 235 | Bacteria.Proteobacteria.Betaproteobacteria.Nitrosomonadales.Nitrosomonadaceae                                             | 1.099        |                     |                                   |

|            |                                                                                                                             |              |                     |                                 |
|------------|-----------------------------------------------------------------------------------------------------------------------------|--------------|---------------------|---------------------------------|
| 236        | Bacteria.Proteobacteria.Gammaproteobacteria.Pasteurellales.Pasteurellaceae.Aggregatibacter                                  | 1.391        |                     |                                 |
| 237        | Bacteria.Bacteroidetes.Cytophagia.Cytophagales                                                                              | 0.947        |                     |                                 |
| 238        | Bacteria.Chloroflexi.Thermomicrobia.JG30_KF_CM45                                                                            | 1.350        |                     |                                 |
| 239        | Bacteria.Bacteroidetes.Bacteroidia.Bacteroidales.Porphyromonadaceae.Parabacteroides.Parabacteroides_distasonis              | 2.037        |                     |                                 |
| 240        | Bacteria.Planctomycetes._Brocadiae_.Brocadiales                                                                             | 1.673        |                     |                                 |
| 241        | Bacteria.Firmicutes.Clostridia.Clostridiales.Clostridiaceae                                                                 | 3.161        |                     |                                 |
| 242        | Bacteria.Firmicutes.Clostridia.Clostridiales.Veillonellaceae.Phascolarctobacterium                                          | 1.549        |                     |                                 |
| 243        | Bacteria.Proteobacteria.Deltaproteobacteria.NB1_j                                                                           | 1.044        |                     |                                 |
| 244        | Bacteria.Proteobacteria.Deltaproteobacteria.Bdellovibrionales.Bacteriovoraceae.Peredibacter.Peredibacter_starrii            | 0.903        |                     |                                 |
| <b>245</b> | <b>Bacteria.Firmicutes.Clostridia.Clostridiales.Ruminococcaceae.Ruminococcus.Ruminococcus_albus</b>                         | <b>1.545</b> | <b>2.950<br/>26</b> | <b>CTX+<br/>6 mg/kg<br/>LEP</b> |
| 246        | Bacteria.Bacteroidetes.Bacteroidia.Bacteroidales._Paraprevotellaceae_.Prevotella_                                           | 1.056        |                     |                                 |
| 247        | Bacteria.Firmicutes.Bacilli.Bacillales.Staphylococcaceae                                                                    | 3.329        |                     |                                 |
| 248        | Bacteria.Proteobacteria.Betaproteobacteria.Methylophilales.Methylophilaceae.Methylothermobacter.Methylothermobacter_sativus | 1.345        |                     |                                 |
| 249        | Bacteria.Proteobacteria.Betaproteobacteria.Methylophilales.Methylophilaceae.Methylothermobacter                             | 1.345        |                     |                                 |
| 250        | Bacteria.Proteobacteria.Betaproteobacteria.Rhodocyclales                                                                    | 2.430        |                     |                                 |
| 251        | Bacteria.Actinobacteria.Actinobacteria.Actinomycetales.Mycobacteriaceae                                                     | 1.748        |                     |                                 |
| 252        | Bacteria.Planctomycetes._Brocadiae_.Brocadiales.Brocadiaceae.Candidatus_Brocadia                                            | 1.673        |                     |                                 |
| 253        | Bacteria.Proteobacteria.Gammaproteobacteria                                                                                 | 3.027        |                     |                                 |
| 254        | Bacteria.Actinobacteria.Actinobacteria                                                                                      | 2.475        |                     |                                 |
| 255        | Bacteria.Proteobacteria.Betaproteobacteria.Burkholderiales.Oxalobacteraceae.Ralstonia                                       | 1.014        |                     |                                 |
| 256        | Bacteria.Actinobacteria.Actinobacteria.Actinomycetales.Cellulomonadaceae                                                    | 1.014        |                     |                                 |
| 257        | Bacteria.Firmicutes.Clostridia.Clostridiales.Veillonellaceae.Selenomonas                                                    | 1.679        |                     |                                 |
| 258        | Bacteria.Proteobacteria.Alphaproteobacteria.Rhodospirillales.Rhodospirillaceae.Dongia                                       | 1.315        |                     |                                 |
| 259        | Bacteria.Acidobacteria.Acidobacteria_6.CCU21                                                                                | 0.838        |                     |                                 |
| 260        | Bacteria.Firmicutes.Bacilli.Lactobacillales.Enterococcaceae.Enterococcus                                                    | 3.327        |                     |                                 |

|     |                                                                                                             |              |              |                |
|-----|-------------------------------------------------------------------------------------------------------------|--------------|--------------|----------------|
| 261 | Bacteria.Chlorobi.OPB56                                                                                     | 1.048        |              |                |
| 262 | Bacteria.Verrucomicrobia.Verrucomicrobiae.Verrucomicrobiales.Verrucomicrobiaceae.Akkermansia                | 2.563        |              |                |
| 263 | Bacteria.TM7.TM7_1                                                                                          | 1.023        |              |                |
| 264 | Bacteria.Proteobacteria.Betaproteobacteria.Hydrogenophilales.Hydrogenophilaceae                             | 2.313        |              |                |
| 265 | Bacteria.Proteobacteria.Gammaproteobacteria.Oceanospirillales.Oceanospirillaceae                            | 1.283        |              |                |
| 266 | Bacteria.Firmicutes.Clostridia.Clostridiales.Veillonellaceae.Selenomonas.Selenomonas_lacticifex             | 1.679        |              |                |
| 267 | Bacteria.Synergistetes.Synergistia.Synergistales                                                            | 0.965        |              |                |
| 268 | Bacteria.TM7                                                                                                | 3.484        |              |                |
| 269 | Bacteria.Actinobacteria.Actinobacteria.Actinomycetales.Nocardioideae.Marmoricola                            | 1.245        |              |                |
| 270 | Bacteria.Firmicutes.Clostridia.Clostridiales.Lachnospiraceae._Ruminococcus_                                 | 3.848        |              |                |
| 271 | Bacteria.Proteobacteria.Gammaproteobacteria.Xanthomonadales.Xanthomonadaceae.Thermomonas                    | 1.830        |              |                |
| 272 | Bacteria.Planctomycetes.Planctomycetia.Gemmatales                                                           | 1.111        |              |                |
| 273 | Bacteria.Proteobacteria.Gammaproteobacteria.Chromatiales                                                    | 1.755        |              |                |
| 274 | Bacteria.Proteobacteria.Alphaproteobacteria.Rhodospirillales.Rhodospirillaceae.Phaeospirillum               | 1.357        |              |                |
| 275 | Bacteria.Bacteroidetes.Bacteroidia.Bacteroidales._Barnesiellaceae_.Barnesiella                              | 1.197        |              |                |
| 276 | Bacteria.Firmicutes.Clostridia.Clostridiales.Ruminococcaceae.Ruminococcus.Ruminococcus_bromii               | 1.921        |              |                |
| 277 | <b>Bacteria.Firmicutes.Erysipelotrichi</b>                                                                  | <b>3.714</b> | <b>3.365</b> | <b>0 mg/kg</b> |
|     |                                                                                                             |              | <b>31</b>    | <b>PAP</b>     |
| 278 | Bacteria.Actinobacteria.Coriobacteriia.Coriobacteriales.Coriobacteriaceae                                   | 3.711        |              |                |
| 279 | Bacteria.Firmicutes.Erysipelotrichi.Erysipelotrichales.Erysipelotrichaceae.Coprobacillus                    | 1.241        |              |                |
| 280 | Bacteria.Actinobacteria.KIST_JJY010                                                                         | 0.823        |              |                |
| 281 | Bacteria.Proteobacteria.Alphaproteobacteria.Rhodospirillales.Rhodospirillaceae.Azospirillum                 | 1.534        |              |                |
| 282 | Bacteria.Bacteroidetes.Bacteroidia.Bacteroidales.p_2534_18B5                                                | 1.144        |              |                |
| 283 | Bacteria.Tenericutes.Mollicutes.Anaeroplasmatales.Anaeroplasmataceae                                        | 2.900        |              |                |
| 284 | Bacteria.Chloroflexi.Ktedonobacteria.Thermogemmatissporales.Thermogemmatissporaceae                         | 0.822        |              |                |
| 285 | Bacteria.Cyanobacteria                                                                                      | 2.121        |              |                |
| 286 | Bacteria.Proteobacteria.Gammaproteobacteria.Alteromonadales.Alteromonadaceae                                | 1.901        |              |                |
| 287 | Bacteria.Proteobacteria.Gammaproteobacteria.Pseudomonadales.Moraxellaceae                                   | 2.626        |              |                |
| 288 | Bacteria.Bacteroidetes.Bacteroidia.Bacteroidales.Porphyromonadaceae.Parabacteroides.Parabacteroides_gordoni | 0.646        |              |                |

i

|     |                                                                                                                              |              |                     |                                   |
|-----|------------------------------------------------------------------------------------------------------------------------------|--------------|---------------------|-----------------------------------|
| 289 | Bacteria.Proteobacteria.Alphaproteobacteria.Sphingomonadales.Sphingomonadaceae                                               | 1.524        |                     |                                   |
| 290 | Bacteria.Cyanobacteria.Chloroplast.Streptophyta                                                                              | 1.666        |                     |                                   |
| 291 | Bacteria.Firmicutes.Clostridia.Clostridiales.Ruminococcaceae.Faecalibacterium                                                | 2.427        |                     |                                   |
| 292 | Bacteria.Firmicutes.Clostridia.Clostridiales.Lachnospiraceae._Ruminococcus_. _Ruminococcus__gnavus                           | 3.848        |                     |                                   |
| 293 | Bacteria.Proteobacteria.Betaproteobacteria.Nitrosomonadales.Nitrosomonadaceae.Nitrosomonas                                   | 1.099        |                     |                                   |
| 294 | Bacteria.Acidobacteria._Chloracidobacteria_.11_24                                                                            | 1.204        |                     |                                   |
| 295 | Bacteria.Bacteroidetes.Bacteroidia.Bacteroidales                                                                             | 5.706        |                     |                                   |
| 296 | Bacteria.Bacteroidetes.Bacteroidia.Bacteroidales.Rikenellaceae.Blvii28                                                       | 1.528        |                     |                                   |
| 297 | Bacteria.Cyanobacteria.Synechococcophycideae.Synechococcales.Synechococcaceae                                                | 0.947        |                     |                                   |
| 298 | Bacteria.Firmicutes.Bacilli.Lactobacillales.Leuconostocaceae                                                                 | 1.049        |                     |                                   |
| 299 | Bacteria.Firmicutes.Clostridia.Clostridiales.Ruminococcaceae.Clostridium                                                     | 1.556        |                     |                                   |
| 300 | Bacteria.Bacteroidetes.Bacteroidia.Bacteroidales.Marinilabiaceae                                                             | 1.044        |                     |                                   |
| 301 | Bacteria.Firmicutes.Bacilli.Bacillales.Thermoactinomycetaceae.Thermoactinomyces                                              | 1.725        |                     |                                   |
| 302 | Bacteria.Proteobacteria.Gammaproteobacteria.Pasteurellales.Pasteurellaceae                                                   | 1.391        |                     |                                   |
| 303 | Bacteria.Verrucomicrobia.Verruco_5.WCHB1_41                                                                                  | 0.903        |                     |                                   |
| 304 | Bacteria.Firmicutes.Clostridia.Clostridiales.Lachnospiraceae.Dorea.Dorea_longicatena                                         | 0.843        |                     |                                   |
| 305 | Bacteria.Firmicutes.Clostridia.Clostridiales.Peptococcaceae                                                                  | 2.744        |                     |                                   |
| 306 | Bacteria.Actinobacteria.Rubrobacteria                                                                                        | 0.872        |                     |                                   |
| 307 | Bacteria.Firmicutes.Bacilli.Lactobacillales.Enterococcaceae                                                                  | 3.329        |                     |                                   |
| 308 | Bacteria.Proteobacteria.Gammaproteobacteria.Pasteurellales.Pasteurellaceae.Aggregatibacter.Aggregatibacter_p<br>neumotropica | 1.391        |                     |                                   |
| 309 | Bacteria.Actinobacteria.Actinobacteria.Actinomycetales.Micrococcaceae                                                        | 1.792        |                     |                                   |
| 310 | <b>Bacteria.Bacteroidetes.Bacteroidia.Bacteroidales._Paraprevotellaceae_</b>                                                 | <b>2.711</b> | <b>2.439<br/>53</b> | <b>CTX+<br/>100 mg/kg<br/>PAP</b> |
| 311 | Bacteria.Firmicutes.Clostridia.Clostridiales.Ruminococcaceae.Gemmiger.Gemmiger_formicilis                                    | 0.789        |                     |                                   |
| 312 | Bacteria.Firmicutes.Bacilli.Lactobacillales.Lactobacillaceae.Lactobacillus.Lactobacillus_pontis                              | 1.511        |                     |                                   |
| 313 | <b>Bacteria.Proteobacteria.Epsilonproteobacteria.Campylobacteriales</b>                                                      | <b>4.190</b> | <b>3.835<br/>68</b> | <b>70 mg/kg<br/>CTX</b>           |
| 314 | Bacteria.Proteobacteria.Gammaproteobacteria.Oceanospirillales.Halomonadaceae.Halomonas                                       | 1.683        |                     |                                   |

|     |                                                                                                                |       |
|-----|----------------------------------------------------------------------------------------------------------------|-------|
| 315 | Bacteria.Acidobacteria.Acidobacteria_6                                                                         | 1.123 |
| 316 | Bacteria.Proteobacteria.Gammaproteobacteria.Legionellales.Legionellaceae                                       | 0.903 |
| 317 | Bacteria.Firmicutes.Bacilli.Lactobacillales.Lactobacillaceae.Pediococcus                                       | 1.721 |
| 318 | Bacteria.Firmicutes.Bacilli                                                                                    | 5.376 |
| 319 | Bacteria.Firmicutes.Erysipelotrichi.Erysipelotrichales.Erysipelotrichaceae.cc_115                              | 2.057 |
| 320 | Bacteria.Firmicutes.Bacilli.Bacillales.Staphylococcaceae.Jeotgalicoccus                                        | 2.098 |
| 321 | Bacteria.Planctomycetes._Brocadiae_                                                                            | 1.673 |
| 322 | Bacteria.Proteobacteria.Alphaproteobacteria.Rhizobiales.Rhizobiaceae.Rhizobium                                 | 1.099 |
| 323 | Bacteria.Proteobacteria.Alphaproteobacteria.Sphingomonadales                                                   | 1.524 |
| 324 | Bacteria.Proteobacteria.Alphaproteobacteria.Sphingomonadales.Sphingomonadaceae.Novosphingobium                 | 1.350 |
| 325 | Bacteria.Bacteroidetes.Bacteroidia.Bacteroidales.Prevotellaceae                                                | 3.585 |
| 326 | Bacteria.Tenericutes                                                                                           | 3.091 |
| 327 | Bacteria.Proteobacteria.Deltaproteobacteria.Myxococcales                                                       | 1.573 |
| 328 | Bacteria.Proteobacteria.Betaproteobacteria.Burkholderiales.Burkholderiaceae.Burkholderia                       | 0.965 |
| 329 | Bacteria.Proteobacteria.Betaproteobacteria.Burkholderiales.Comamonadaceae.Ramlibacter                          | 1.236 |
| 330 | Bacteria.Actinobacteria.Thermoleophilia                                                                        | 0.872 |
| 331 | Bacteria.Proteobacteria.Betaproteobacteria.Burkholderiales.Comamonadaceae.Comamonas                            | 1.596 |
| 332 | Bacteria.Bacteroidetes.Bacteroidia.Bacteroidales.Rikenellaceae.Alistipes.Alistipes_onderdonkii                 | 1.646 |
| 333 | Bacteria.Proteobacteria.Gammaproteobacteria.Oceanospirillales                                                  | 1.829 |
| 334 | Bacteria.Firmicutes.Clostridia.Clostridiales                                                                   | 5.606 |
| 335 | Bacteria.OP8                                                                                                   | 1.119 |
| 336 | Bacteria.Firmicutes.Bacilli.Gemellales                                                                         | 1.701 |
| 337 | Bacteria.Firmicutes.Clostridia.Clostridiales.Ruminococcaceae.Clostridium.Clostridium_methylpentosum            | 1.556 |
| 338 | Bacteria.Actinobacteria.Coriobacteriia.Coriobacteriales                                                        | 3.711 |
| 339 | Bacteria.Firmicutes.Bacilli.Lactobacillales.Streptococcaceae.Lactococcus                                       | 3.548 |
| 340 | Bacteria.Gemmatimonadetes.Gemmatimonadetes.Gemmatimonadales                                                    | 0.798 |
| 341 | Bacteria.Proteobacteria.Betaproteobacteria.Burkholderiales.Burkholderiaceae.Burkholderia.Burkholderia_gladiali | 0.965 |
| 342 | Bacteria.Actinobacteria.Rubrobacteria.Rubrobacterales                                                          | 0.872 |
| 343 | Bacteria.Bacteroidetes.Bacteroidia.Bacteroidales._Barnesiellaceae_.Barnesiella.Barnesiella_intestinihominis    | 1.197 |

|            |                                                                                                     |              |              |                 |
|------------|-----------------------------------------------------------------------------------------------------|--------------|--------------|-----------------|
| 344        | Bacteria.Chloroflexi.TK10.B07_WMSP1                                                                 | 0.843        |              |                 |
| 345        | Bacteria.Firmicutes.Clostridia.Clostridiales.Ruminococcaceae.Ruminococcus.Ruminococcus_callidus     | 1.204        |              |                 |
| 346        | Bacteria.Actinobacteria.Actinobacteria.Bifidobacteriales.Bifidobacteriaceae.Gardnerella             | 1.683        |              |                 |
| 347        | Bacteria.Proteobacteria.Gammaproteobacteria.Legionellales.Coxiellaceae                              | 1.244        |              |                 |
| 348        | Bacteria.Tenericutes.Mollicutes.Anaeroplasmatales.Anaeroplasmataceae.Anaeroplasma                   | 2.900        |              |                 |
| 349        | Bacteria.Proteobacteria.Gammaproteobacteria.Pseudomonadales.Moraxellaceae.Alkanindiges              | 1.119        |              |                 |
| 350        | Bacteria.Proteobacteria.Betaproteobacteria.Burkholderiales.Comamonadaceae.Rubrivivax                | 1.486        |              |                 |
| 351        | Bacteria.Chlorobi.Ignavibacteria                                                                    | 0.947        |              |                 |
| 352        | Bacteria.Bacteroidetes.Cytophagia                                                                   | 0.947        |              |                 |
| 353        | Bacteria.Proteobacteria.Betaproteobacteria.Procabbacteriales.Procabbacteriaceae                     | 0.823        |              |                 |
| <b>354</b> | <b>Bacteria.Chloroflexi.Anaerolineae.SBR1031.SHA_31</b>                                             | <b>1.911</b> | <b>2.440</b> | <b>70 mg/kg</b> |
|            |                                                                                                     |              | <b>34</b>    | <b>CTX</b>      |
| 355        | Bacteria.Firmicutes.Erysipelotrichi.Erysipelotrichales.Erysipelotrichaceae.Allobaculum              | 0.872        |              |                 |
| 356        | Bacteria.Proteobacteria.Alphaproteobacteria.Rhodospirillales                                        | 2.169        |              |                 |
| 357        | Bacteria.Acidobacteria                                                                              | 1.373        |              |                 |
| 358        | Bacteria.Actinobacteria.Actinobacteria.Actinomycetales.Nocardioideaceae.Nocardioide                 | 0.873        |              |                 |
| 359        | Bacteria.Firmicutes.Bacilli.Bacillales                                                              | 3.362        |              |                 |
| 360        | Bacteria.Firmicutes.Clostridia.Clostridiales.Lachnospiraceae.Shuttleworthia                         | 1.474        |              |                 |
| 361        | Bacteria.Bacteroidetes.Flavobacteriia.Flavobacteriales                                              | 0.798        |              |                 |
| 362        | Bacteria.Firmicutes.Clostridia.Clostridiales.Ruminococcaceae.Ruminococcus.Ruminococcus_flavefaciens | 2.041        |              |                 |
| 363        | Bacteria.Spirochaetes.Spirochaetes.Spirochaetales.Spirochaetaceae                                   | 0.823        |              |                 |
| 364        | Bacteria.Bacteroidetes.Bacteroidia.Bacteroidales._Barnesiellaceae_                                  | 1.197        |              |                 |
| 365        | Bacteria.Actinobacteria.Coriobacteriia.Coriobacteriales.Coriobacteriaceae.Eggerthella               | 0.847        |              |                 |
| 366        | Bacteria.Chloroflexi.Ktedonobacteria.Thermogemmatissporales                                         | 0.822        |              |                 |
| 367        | Bacteria.Proteobacteria.Betaproteobacteria.Rhodocyclales.Rhodocyclaceae                             | 2.430        |              |                 |
| 368        | Bacteria.Proteobacteria.Gammaproteobacteria.Enterobacteriales.Enterobacteriaceae.Shigella           | 1.978        |              |                 |
| 369        | Bacteria.Proteobacteria.Betaproteobacteria.Hydrogenophilales                                        | 2.313        |              |                 |
| 370        | Bacteria.Proteobacteria.Deltaproteobacteria.Desulfovibrionales.Desulfovibrionaceae.Bilophila        | 2.890        |              |                 |
| 371        | Bacteria.Chloroflexi.TK10                                                                           | 0.843        |              |                 |
| 372        | Bacteria.Chlorobi                                                                                   | 1.048        |              |                 |

|     |                                                                                                                  |              |              |                  |
|-----|------------------------------------------------------------------------------------------------------------------|--------------|--------------|------------------|
| 373 | Bacteria.Bacteroidetes.Bacteroidia                                                                               | 5.706        |              |                  |
| 374 | Bacteria.Firmicutes.Bacilli.Bacillales.Thermoactinomycetaceae                                                    | 1.725        |              |                  |
| 375 | Bacteria.Proteobacteria.Gammaproteobacteria.Pseudomonadales.Moraxellaceae.Acinetobacter.Acinetobacter_guillouiae | 2.432        |              |                  |
| 376 | Bacteria.Bacteroidetes.Bacteroidia.Bacteroidales.Prevotellaceae.Prevotella                                       | 3.584        |              |                  |
| 377 | Bacteria.Proteobacteria.Betaproteobacteria.Procabbacteriales.Procabbacteriaceae.Procabacter                      | 0.823        |              |                  |
| 378 | Bacteria.Firmicutes.Clostridia.Clostridiales.Eubacteriaceae.Anaerofustis                                         | 1.270        |              |                  |
| 379 | Bacteria.Firmicutes.Bacilli.Lactobacillales.Lactobacillaceae.Lactobacillus.Lactobacillus_vaginalis               | 4.125        |              |                  |
| 380 | Bacteria.Proteobacteria.Gammaproteobacteria.Chromatiales.Ectothiorhodospiraceae                                  | 1.755        |              |                  |
| 381 | Bacteria.Verrucomicrobia.Verruco_5.WCHB1_41.RFP12                                                                | 0.903        |              |                  |
| 382 | Bacteria.Actinobacteria.Thermoleophilia.Gaiellales                                                               | 0.872        |              |                  |
| 383 | Bacteria.Bacteroidetes.Bacteroidia.Bacteroidales.Porphyromonadaceae.Macellibacteroides                           | 0.798        |              |                  |
| 384 | Bacteria.Proteobacteria.Gammaproteobacteria.Xanthomonadales.Xanthomonadaceae.Pseudoxanthomonas                   | 1.056        |              |                  |
| 385 | Bacteria.Firmicutes.Bacilli.Lactobacillales                                                                      | 5.372        |              |                  |
| 386 | Bacteria.Firmicutes.Bacilli.Lactobacillales.Aerococcaceae.Atopostipes.Atopostipes_suicloacalis                   | 2.196        |              |                  |
| 387 | Bacteria.Proteobacteria.Betaproteobacteria.Rhodocyclales.Rhodocyclaceae.Zoogloea                                 | 2.193        |              |                  |
| 388 | Bacteria.Gemmatimonadetes.Gemmatimonadetes                                                                       | 0.798        |              |                  |
| 389 | <b>Bacteria.Proteobacteria.Gammaproteobacteria.Alteromonadales.Idiomarinaceae</b>                                | <b>1.720</b> | <b>2.773</b> | <b>CTX+</b>      |
|     |                                                                                                                  |              | <b>53</b>    | <b>100 mg/kg</b> |
|     |                                                                                                                  |              |              | <b>PAP</b>       |
| 390 | Bacteria.Firmicutes.Clostridia.Clostridiales.Lachnospiraceae.Lactonifactor                                       | 0.943        |              |                  |
| 391 | Bacteria.Cyanobacteria.Chloroplast                                                                               | 1.666        |              |                  |
| 392 | Bacteria.Gemmatimonadetes.Gemm_2                                                                                 | 0.774        |              |                  |
| 393 | Bacteria.Firmicutes.Bacilli.Lactobacillales.Lactobacillaceae                                                     | 5.360        |              |                  |
| 394 | Bacteria.Proteobacteria.Deltaproteobacteria.Desulfovibrionales.Desulfovibrionaceae                               | 4.400        |              |                  |
| 395 | Bacteria.Chloroflexi                                                                                             | 2.102        |              |                  |
| 396 | Bacteria.Firmicutes.Bacilli.Lactobacillales.Lactobacillaceae.Lactobacillus.Lactobacillus_helveticus              | 1.602        |              |                  |
| 397 | Bacteria.Firmicutes.Clostridia.Clostridiales.Ruminococcaceae.Oscillospira.Oscillospira_guilliermondii            | 0.872        |              |                  |
| 398 | Bacteria.Bacteroidetes.Bacteroidia.Bacteroidales.Rikenellaceae.Alistipes                                         | 3.643        |              |                  |
| 399 | Bacteria.Firmicutes.Clostridia.Clostridiales.Veillonellaceae                                                     | 1.946        |              |                  |



|     |                                                                                                      |              |              |                |
|-----|------------------------------------------------------------------------------------------------------|--------------|--------------|----------------|
| 400 | Bacteria.Proteobacteria.Gammaproteobacteria.HOC36                                                    | 0.880        |              |                |
| 401 | Bacteria.Chlamydiae.Chlamydiia.Chlamydiales                                                          | 0.903        |              |                |
| 402 | Bacteria.Verrucomicrobia.Verrucomicrobiae                                                            | 2.563        |              |                |
| 403 | Bacteria.Firmicutes.Clostridia                                                                       | 5.606        |              |                |
| 404 | Bacteria.Actinobacteria.Actinobacteria.Actinomycetales.Cellulomonadaceae.Cellulomonas                | 1.014        |              |                |
| 405 | Bacteria.Firmicutes.Clostridia.Clostridiales.Lachnospiraceae.Coprococcus                             | 3.609        |              |                |
| 406 | Bacteria.Firmicutes.Erysipelotrichi.Erysipelotrichales.Erysipelotrichaceae.Clostridium               | 2.090        |              |                |
| 407 | Bacteria.Synergistetes                                                                               | 0.965        |              |                |
| 408 | Bacteria.Firmicutes.Bacilli.Bacillales.Planococcaceae.Sporosarcina                                   | 1.497        |              |                |
| 409 | Bacteria.Firmicutes.Clostridia.Clostridiales.Clostridiaceae.Clostridium                              | 3.114        |              |                |
| 410 | Bacteria.Proteobacteria.Gammaproteobacteria.Legionellales.Legionellaceae.Legionella                  | 0.903        |              |                |
| 411 | Bacteria.Chloroflexi.Anaerolineae.SBR1031.SJA_101                                                    | 0.998        |              |                |
| 412 | Bacteria.Bacteroidetes.Cytophagia.Cytophagales.Cytophagaceae                                         | 0.947        |              |                |
| 413 | Bacteria.Proteobacteria.Alphaproteobacteria.Rhizobiales.Phyllobacteriaceae.Chelativorans             | 0.943        |              |                |
| 414 | Bacteria.Planctomycetes                                                                              | 1.822        |              |                |
| 415 | Bacteria.Bacteroidetes.Bacteroidia.Bacteroidales.Rikenellaceae.Alistipes.Alistipes_finegoldii        | 0.947        |              |                |
| 416 | Bacteria.WPS_2                                                                                       | 1.449        |              |                |
| 417 | Bacteria.Proteobacteria.TA18.CV90                                                                    | 0.823        |              |                |
| 418 | Bacteria.Actinobacteria.Actinobacteria.Actinomycetales.Nocardioideaceae                              | 1.398        |              |                |
| 419 | Bacteria.Bacteroidetes.Bacteroidia.Bacteroidales.BS11                                                | 1.221        |              |                |
| 420 | <b>Bacteria.Bacteroidetes.Bacteroidia.Bacteroidales._Odoribacteraceae._Odoribacter</b>               | <b>4.185</b> | <b>3.623</b> | <b>0 mg/kg</b> |
|     |                                                                                                      |              | <b>11</b>    | <b>PAP</b>     |
| 421 | Bacteria.Proteobacteria.Betaproteobacteria.SC_I_84                                                   | 1.075        |              |                |
| 422 | Bacteria.Firmicutes.Bacilli.Lactobacillales.Leuconostocaceae.Leuconostoc                             | 1.049        |              |                |
| 423 | Bacteria.Verrucomicrobia.Verrucomicrobiae.Verrucomicrobiales                                         | 2.563        |              |                |
| 424 | Bacteria.Deferribacteres.Deferribacteres.Deferribacterales.Deferribacteraceae.Mucispirillum          | 4.715        |              |                |
| 425 | Bacteria.Proteobacteria.Alphaproteobacteria.Caulobacteriales.Caulobacteraceae.Phenylobacterium       | 1.048        |              |                |
| 426 | Bacteria.Tenericutes.Mollicutes                                                                      | 3.091        |              |                |
| 427 | Bacteria.Bacteroidetes.Bacteroidia.Bacteroidales.Bacteroidaceae.Bacteroides.Bacteroides_acidifaciens | 4.292        |              |                |
| 428 | Bacteria.Proteobacteria.Betaproteobacteria.Burkholderiales                                           | 2.901        |              |                |

|            |                                                                                          |              |              |                 |
|------------|------------------------------------------------------------------------------------------|--------------|--------------|-----------------|
| 429        | Bacteria.Firmicutes.Bacilli.Bacillales.Planococcaceae.Staphylococcus                     | 1.604        |              |                 |
| 430        | Bacteria.Proteobacteria.Betaproteobacteria.Burkholderiales.Alcaligenaceae.Sutterella     | 2.879        |              |                 |
| 431        | Bacteria.Firmicutes.Clostridia.Clostridiales.Ruminococcaceae.Anaerotruncus               | 2.948        |              |                 |
| 432        | Bacteria.Proteobacteria.Betaproteobacteria.Burkholderiales.Comamonadaceae.Hydrogenophaga | 0.789        |              |                 |
| 433        | Bacteria.Chlorobi.Ignavibacteria.Ignavibacteriales                                       | 0.947        |              |                 |
| 434        | Bacteria.Chloroflexi.Ktedonobacteria                                                     | 0.822        |              |                 |
| 435        | Bacteria.Deferribacteres.Deferribacteres.Deferribacterales                               | 4.715        |              |                 |
| 436        | Bacteria.Chloroflexi.Gitt_GS_136                                                         | 1.139        |              |                 |
| 437        | Bacteria.Firmicutes.Bacilli.Lactobacillales.Aerococcaceae.Atopostipes                    | 2.196        |              |                 |
| 438        | Bacteria.Firmicutes.Clostridia.Clostridiales.Veillonellaceae.Megasphaera                 | 0.872        |              |                 |
| 439        | Bacteria.Chloroflexi.Anaerolineae.GCA004                                                 | 1.289        |              |                 |
| 440        | Bacteria.Bacteroidetes.Bacteroidia.Bacteroidales.Porphyromonadaceae                      | 2.576        |              |                 |
| 441        | Bacteria.Actinobacteria                                                                  | 3.730        |              |                 |
| 442        | Bacteria.Actinobacteria.Actinobacteria.Actinomycetales.Mycobacteriaceae.Mycobacterium    | 1.748        |              |                 |
| 443        | Bacteria.Planctomycetes.Planctomycetia.Gemmatales.Gemmataceae                            | 1.111        |              |                 |
| <b>444</b> | <b>Bacteria.Chloroflexi.Anaerolineae</b>                                                 | <b>2.078</b> | <b>2.537</b> | <b>70 mg/kg</b> |
|            |                                                                                          |              | <b>82</b>    | <b>CTX</b>      |

Ctrl, control, CTX, cyclophosphamide; PAPS1, water-soluble PA polysaccharides, LNT, lentinan.
